# Supplementary material for: In Vitro Antifungal Activity of Chimeric Peptides Derived from Bovine Lactoferricin and Buforin II against Cryptococcus neoformans var. grubii
Source: MDPI journal article supplement (doi:10.3390/antibiotics11121819), 2022-12-15

# In Vitro Antifungal Activity of Chimeric Peptides Derived from Bovine Lactoferricin and Buforin II against *Cryptococcus neoformans* var. *grubii*

Silvia Katherine Carvajal <sup>1</sup>, Yerly Vargas-Casanova <sup>1</sup>, Héctor Manuel Pineda-Castañeda <sup>2</sup>, Javier Eduardo García-Castañeda <sup>3</sup>, Zuly Jenny Rivera-Monroy <sup>2</sup> and Claudia Marcela Parra-Giraldo <sup>1,\*</sup>

**Table S1.** Strains used in the study.

|                   | Code       | Description                                                                       |
|-------------------|------------|-----------------------------------------------------------------------------------|
| Reference strain  | H99        | Parental strain from the H. Madhani 2007 collection: CM018 deposited at FGSC      |
|                   | Gen        | Function                                                                          |
| Mutants           | CNAG_04693 | <i>sin1</i> Target of rapamycin complex 2 subunit                                 |
|                   | CNAG_01580 | <i>scp1</i> Sterol regulatory element-binding protein cleavage-activating protein |
|                   | CNAG_04804 | <i>sre1</i> Sterol regulatory element-binding protein                             |
|                   | CNAG_06925 | - Arsenical-resistance protein                                                    |
|                   | CNAG_02050 | <i>qdr1</i> Putative MFS multidrug transporter                                    |
|                   | CNAG_02430 | - ABC transporter ABCC.6                                                          |
|                   | CNAG_06348 | <i>pdr5-3</i> ABC transporter PMR5                                                |
|                   | CNAG_00730 | <i>afr1</i> ATP-binding cassette transporter                                      |
|                   | CNAG_05150 | - ATP-binding cassette transporter                                                |
|                   | CNAG_02341 | - Cyclin binding protein                                                          |
|                   | CNAG_02915 | <i>pdh1</i> AGC/PDK1 protein kinase                                               |
| Clinical isolates | 2807       | Isolated from HIV positive patient                                                |
|                   | 3279       | N/I                                                                               |
|                   | 2643       | Isolated from HIV positive patient                                                |

(-) Mutants that do not have an associated gene name according to FungiDB.

N/I: no information.

|                                 | μg/mL | Inhibition (%) |      |      |     |      |      |     |
|---------------------------------|-------|----------------|------|------|-----|------|------|-----|
|                                 |       | 200            | 100  | 50   | 25  | 12.5 | 6.25 | C+  |
| [K]-BFII (32-35) <sub>Pal</sub> | 200   | 7,2            | 0,0  | 0,0  | 0,3 | 0,0  | 0,0  | 0,0 |
|                                 | 100   | 8,2            | 0,0  | 1,6  | 2,5 | 0,0  | 0,0  | 0,0 |
|                                 | 50    | 10,0           | 0,0  | 0,0  | 0,0 | 0,0  | 0,0  | 0,0 |
|                                 | 25    | 11,9           | 3,1  | 0,6  | 1,9 | 0,0  | 0,0  | 0,3 |
|                                 | 12.5  | 9,4            | 0,9  | 0,0  | 0,0 | 0,0  | 0,0  | 0,0 |
|                                 | 6.25  | 6,9            | 1,3  | 0,0  | 3,4 | 0,0  | 0,0  | 0,0 |
| C+                              | 0     | 0,0            | 0,0  | 0,0  | 0,0 | 0,0  | 0,0  | 0,0 |
|                                 |       | 3.125          | 6.25 | 12.5 | 25  | 50   | 100  |     |
| LfcinB (20-25)                  |       |                |      |      |     |      |      |     |

|                             | μg/mL | Inhibition (%) |      |      |     |      |       |       |
|-----------------------------|-------|----------------|------|------|-----|------|-------|-------|
|                             |       | 200            | 100  | 50   | 25  | 12.5 | 6.25  | C+    |
| [K]-LfcinB (20-25)          | 200   | 0,0            | 0,0  | 0,0  | 0,0 | 0,0  | 100,0 | 100,0 |
|                             | 100   | 0,0            | 0,0  | 0,0  | 0,0 | 0,0  | 0,4   | 99,6  |
|                             | 50    | 0,0            | 0,0  | 0,0  | 0,0 | 0,0  | 0,0   | 92,1  |
|                             | 25    | 0,0            | 0,0  | 0,0  | 0,0 | 0,0  | 0,0   | 40,9  |
|                             | 12.5  | 0,0            | 0,0  | 0,0  | 0,0 | 0,0  | 0,0   | 41,9  |
|                             | 6.25  | 0,0            | 0,0  | 0,0  | 0,0 | 0,0  | 0,0   | 14,7  |
| C+                          | 0     | 0,0            | 0,0  | 0,0  | 0,0 | 0,0  | 0,0   | 91,8  |
|                             |       | 3.125          | 6.25 | 12.5 | 25  | 50   | 100   |       |
| BFII (32-35) <sub>pal</sub> |       |                |      |      |     |      |       |       |

**Figure S1.** Effect of the physical combination between: (a) [K]-BFII (32-35)<sub>Pal</sub> (KLLKKLLK) and LfcinB (20-25) (RRWQWR); (b) [K]-LfcinB (20-25) (KKWQWK) and BFII (32-35)<sub>Pal</sub> (RLLRRLLR). C+: growth control.

**Figure S2.** Chromatographic profile and MS spectra of peptides evaluated. LfcinB [20-25] (A), BFII [32-35]<sub>Pal</sub> (B), C5 (C) and C6 (D) (18).

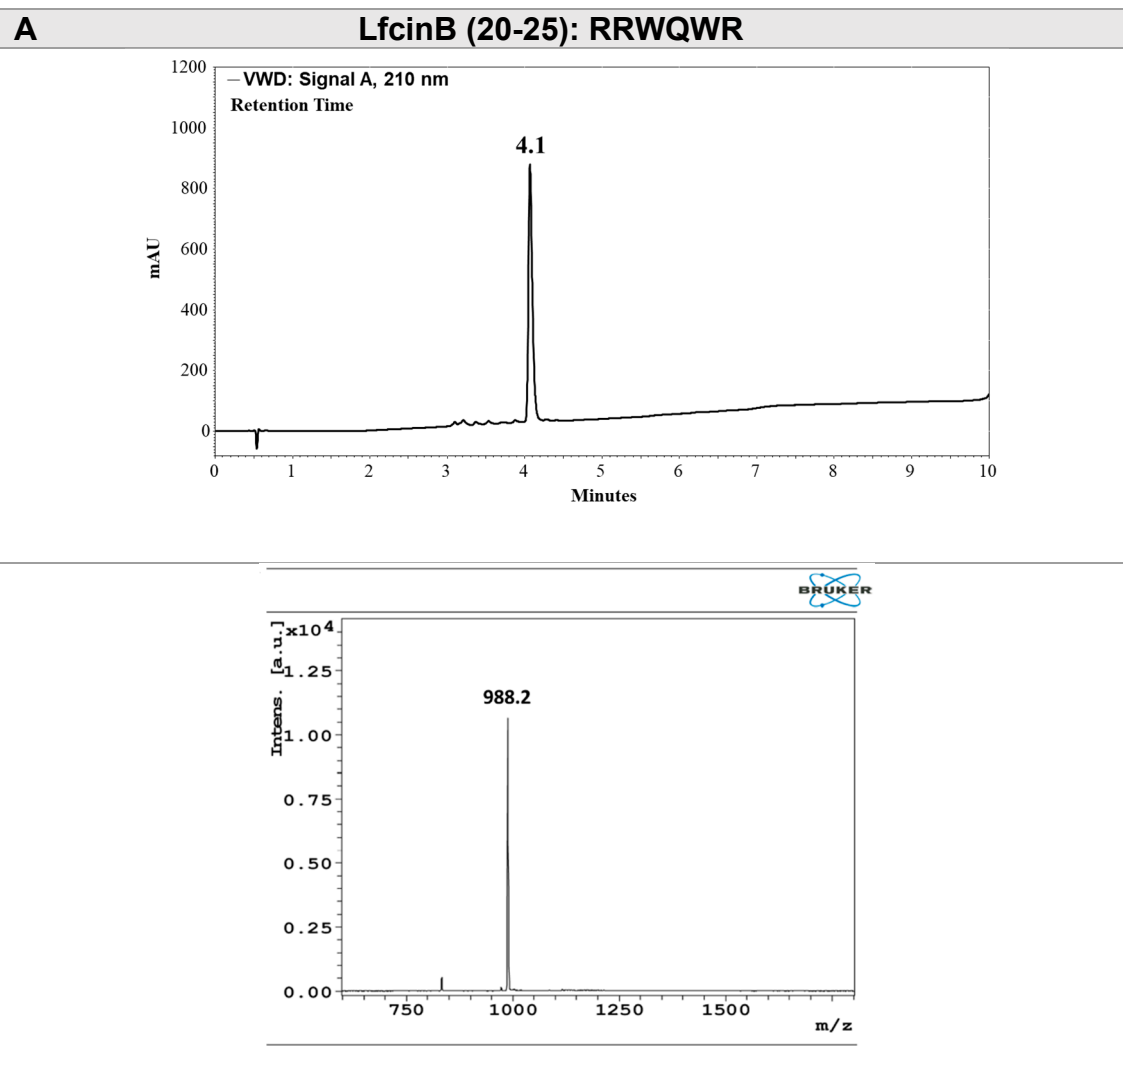

**B** **BFII (32-35): RLLRRLLR**

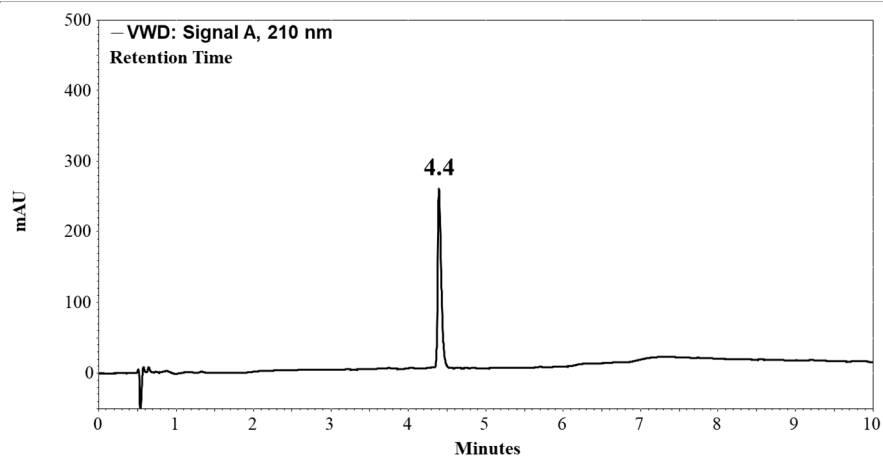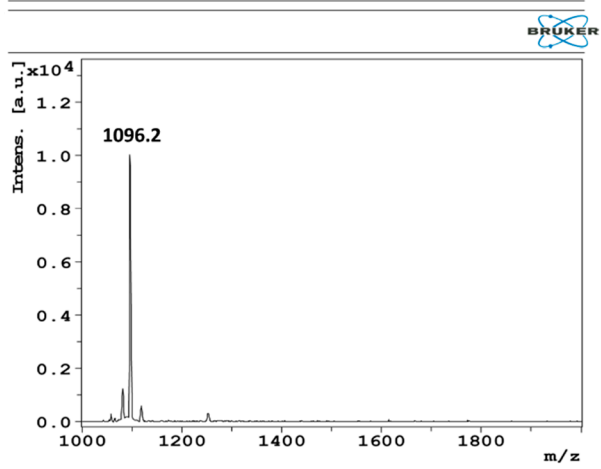

---

**C**

**C5: RRWQWR-Ahx-KLLKKLLK**

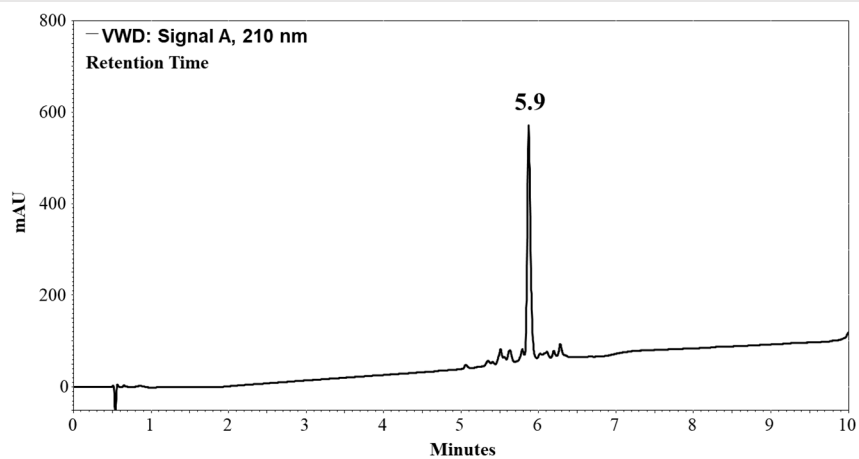

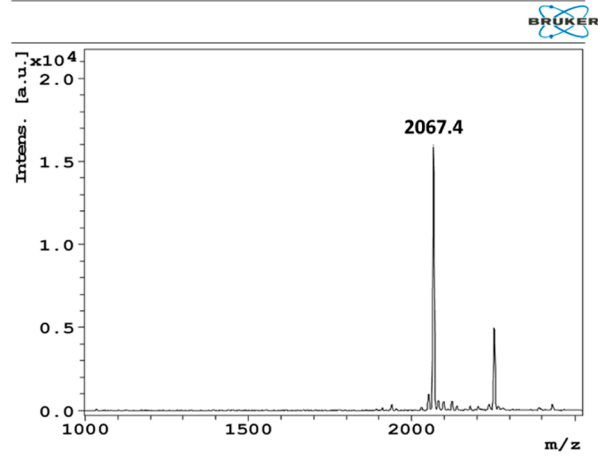

D

C6: KKWQWK-Ahx-RLLRLLR

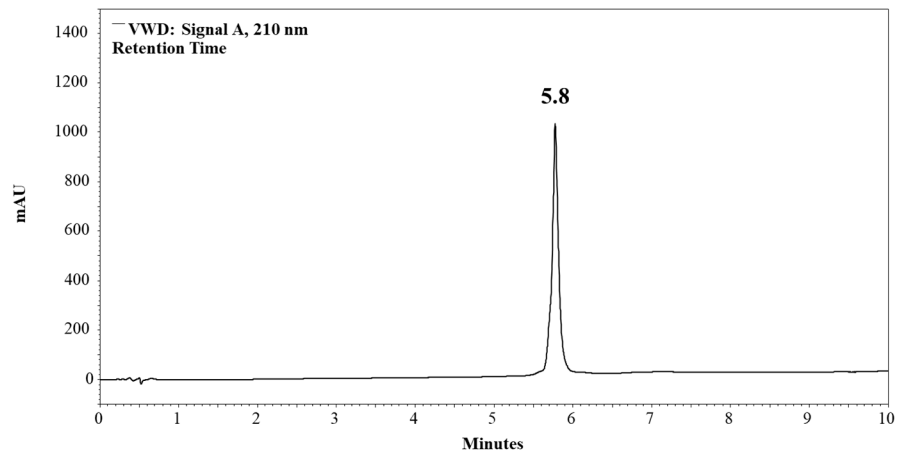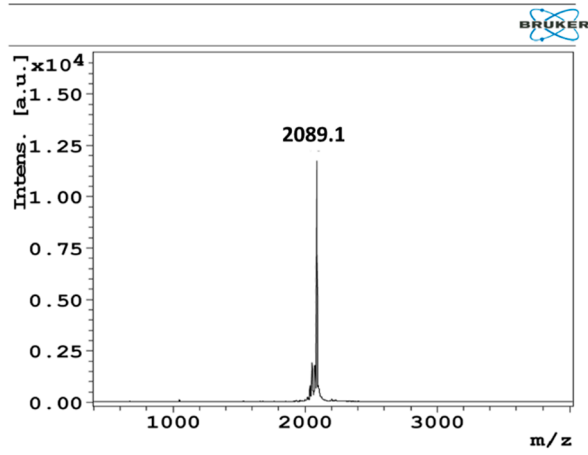

Supplement: s1 [file s1]
